# Supplementary material for: Health-Related Quality of Life, Blood Pressure, and Biochemical and Anthropometric Profile in Vegetarians and Nonvegetarians
Source: J Nutr Metab. 2020 Jul 7;2020:3629742. doi: 10.1155/2020/3629742 (PMC7364203; doi:10.1155/2020/3629742)
Supplement: Supplementary Materials — The dataset of our research has been provided as supplementary material. [file 3629742.f1.xlsx]

## Sheet: Data_Eng
ID	Age	Sex	Place_orig	Marital_stat	Level_Instr	Ocupattion	Diet	Weight	Height	BodyMass_index	Waist_heap	Cholesterol	C_LDL	C_HDL	Triglycerides	Glucose	Blood_pressure	Systolic_BP	Diastolic_BP	t2qf01	t2qf02	t2qf03	t2qf04	t2qf05	t2qf06	t2qf07	t2qf08	t2qf09	t2qf10	t2qf11	t2qf12	t2qf01_a	t2qf08_a	t2qf10_a	t2qf11_a	PF02_1	PF02_2	PF04_1	PF04_2	RP2_1	RP3_1	BP2_1	BP2_2	BP2_3	BP2_4	GH1_1	GH1_2	GH1_3	GH1_4
1	59	1	2	2	2	1	1	64.2	1.46	30.1182	90	240	184	37	96	81	120/70	120	70	2	2	3	2	2	2	2	1	2	2	6	5	4	5	5	1	0	1	0	0	0	0	1	0	0	0	0	0	0	1
2	59	2	1	2	4	1	1	76.2	1.71	26.0593	91.6	216	167	33	81	63	120/80	120	80	3	3	3	1	2	2	2	1	2	2	4	4	3	5	5	3	0	0	0	0	1	0	1	0	0	0	0	0	1	0
3	32	1	1	1	4	2	1	57	1.56	23.4221	77.5	183	113	39	155	85	112/69	112	69	3	3	3	2	2	2	2	1	1	1	5	5	3	5	6	2	0	0	0	0	0	0	1	0	0	0	0	0	1	0
4	36	1	2	1	3	2	1	70.5	1.68	24.9787	81.6	188	136	39	65	60	100/60	100	60	3	3	3	2	2	2	2	1	1	1	5	5	3	5	6	2	0	0	0	0	0	0	1	0	0	0	0	0	1	0
5	19	1	1	1	3	3	1	53.6	1.58	21.4709	72.2	220	152	56	61	60	114/77	114	77	3	3	3	2	2	1	1	1	4	3	4	5	3	5	4	3	0	0	0	0	0	0	1	0	0	0	0	0	1	0
6	37	2	1	2	3	2	1	62	1.7	21.4533	74	196	143	37	81	77	100/66	100	66	3	3	3	2	2	2	2	1	2	2	6	5	3	5	5	1	0	0	0	0	0	0	1	0	0	0	0	0	1	0
7	52	2	1	2	4	1	1	75.8	1.79	23.6572	86.8	194	136	37	107	84	109/75	109	75	2	3	3	1	1	2	2	1	2	2	6	5	4	5	5	1	0	0	0	0	1	1	1	0	0	0	0	0	0	1
8	20	2	1	1	3	3	1	64.4	1.679	22.8446	74.4	209	140	59	51	67	100/70	100	70	2	3	3	3	2	1	2	1	2	2	6	4	4	5	5	1	0	0	0	0	0	0	1	0	0	0	0	0	0	1
9	29	1	3	1	4	1	1	54.9	1.54	23.1489	71.9	213	151	42	99	86	98/55	98	55	3	3	2	2	2	2	2	1	2	2	5	5	3	5	5	2	0	0	0	1	0	0	1	0	0	0	0	0	1	0
10	22	2	1	1	3	1	1	63.1	1.69	22.0931	80	216	153	49	70	76	100/67	100	67	3	3	3	2	2	2	2	2	3	3	5	2	3	4	4	2	0	0	0	0	0	0	0	1	0	0	0	0	1	0
11	18	1	1	1	3	3	1	50	1.47	23.1385	73.5	156	106	40	52	88	110/60	110	60	3	3	3	2	1	1	1	2	4	4	4	5	3	4	3	3	0	0	0	0	0	1	0	1	0	0	0	0	1	0
12	45	1	1	2	2	3	1	54	1.58	21.6311	81	253	172	55	181	78	120/70	120	70	3	3	3	2	1	1	1	1	3	2	5	4	3	5	5	2	0	0	0	0	0	1	1	0	0	0	0	0	1	0
13	17	2	1	1	2	3	1	48.9	1.71	16.7231	63.6	176	98	56	110	69	112/70	112	70	2	3	3	2	1	2	1	2	3	2	5	5	4	4	5	2	0	0	0	0	0	1	0	1	0	0	0	0	0	1
14	46	2	1	2	4	2	1	71.4	1.7	24.7059	89.9	204	132	45	134	71	120/80	120	80	2	3	2	2	2	2	2	1	2	2	5	4	4	5	5	2	0	0	0	1	0	0	1	0	0	0	0	0	0	1
15	26	1	1	1	3	1	2	66.5	1.54	28.0401	81	210	150	45	75	74	110/70	110	70	3	3	3	2	2	2	2	1	2	2	5	5	3	5	5	2	0	0	0	0	0	0	1	0	0	0	0	0	1	0
16	26	1	1	1	3	1	2	52.3	1.5	23.2444	73.8	214	148	51	76	82	92/68	92	68	3	3	3	2	2	1	2	1	1	2	5	5	3	5	5	2	0	0	0	0	0	0	1	0	0	0	0	0	1	0
17	45	2	2	2	3	2	2	90	1.75	29.3878	104.5	181	123	43	74	77	113/76	113	76	2	2	3	1	1	1	2	3	4	5	5	4	4	3	2	2	0	1	0	0	1	1	0	0	1	0	0	0	0	1
18	20	1	1	1	3	3	2	60.4	1.53	25.802	76.8	169	110	45	69	85	108/70	108	70	3	3	3	1	2	2	2	1	3	2	5	4	3	5	5	2	0	0	0	0	1	0	1	0	0	0	0	0	1	0
19	30	1	1	2	2	1	2	57	1.49	25.6745	79.4	208	127	66	75	70	120/60	120	60	4	3	2	2	2	1	1	3	2	4	4	4	2	3	3	3	0	0	0	1	0	0	0	0	1	0	0	1	0	0
20	21	1	1	1	2	1	2	64.6	1.6	25.2344	75.6	163	106	48	45	66	108/70	108	70	3	3	3	2	2	2	2	2	3	4	4	3	3	4	3	3	0	0	0	0	0	0	0	1	0	0	0	0	1	0
21	37	1	1	1	4	2	2	87	1.61	33.5635	92.5	221	161	50	48	83	114/66	114	66	2	3	3	2	2	2	2	1	2	2	5	5	4	5	5	2	0	0	0	0	0	0	1	0	0	0	0	0	0	1
22	19	1	2	1	3	3	2	53	1.49	23.8728	77.15	245	194	42	46	75	106/61	106	61	3	2	2	1	1	2	2	3	3	3	4	4	3	3	4	3	0	1	0	1	1	1	0	0	1	0	0	0	1	0
23	21	1	1	1	3	3	2	57	1.603	22.1824	69.2	255	99	56	93	63	92/65	92	65	3	2	3	2	2	2	2	1	3	3	5	4	3	5	4	2	0	1	0	0	0	0	1	0	0	0	0	0	1	0
24	28	2	2	1	3	2	2	75.8	1.66	27.5076	88.3	205	151	34	98	61	120/70	120	70	2	3	3	2	2	2	2	1	1	1	6	5	4	5	6	1	0	0	0	0	0	0	1	0	0	0	0	0	0	1
25	32	1	2	1	4	2	2	47.7	1.49	21.4855	68.6	132	70.6	53	42	82	111/70	111	70	3	3	3	2	2	2	2	1	2	3	5	5	3	5	4	2	0	0	0	0	0	0	1	0	0	0	0	0	1	0
26	37	1	3	1	3	2	2	51.8	1.495	23.1765	68.8	218	128	77	66	68	113/84	113	84	3	2	2	2	2	2	2	3	2	3	5	4	3	3	4	2	0	1	0	1	0	0	0	0	1	0	0	0	1	0
27	37	1	2	2	4	2	2	52	1.49	23.4224	75.8	144	75	39	150	85	100/60	100	60	3	3	3	2	2	2	2	2	2	4	5	5	3	4	3	2	0	0	0	0	0	0	0	1	0	0	0	0	1	0
28	25	1	3	1	2	1	2	66	1.56	27.1203	86	185	135	35	74	70	100/	100	70	3	3	3	2	2	2	2	1	3	2	6	4	3	5	5	1	0	0	0	0	0	0	1	0	0	0	0	0	1	0
29	27	1	2	1	3	3	2	48.2	1.56	19.806	70	175	117	39	94	74	97/63	97	63	3	3	2	1	1	2	2	3	1	4	5	4	3	3	3	2	0	0	0	1	1	1	0	0	1	0	0	0	1	0
30	34	2	3	2	3	1	2	70.1	1.59	27.7283	93	189	120	56	65	63	100/62	100	62	2	2	2	2	2	2	2	2	2	2	6	5	4	4	5	1	0	1	0	1	0	0	0	1	0	0	0	0	0	1
31	31	1	2	1	3	1	2	73	1.58	29.2421	89.6	189	122	51	79	78	100/60	100	60	2	3	3	2	2	2	2	1	2	2	5	5	4	5	5	2	0	0	0	0	0	0	1	0	0	0	0	0	0	1
32	34	2	1	2	3	2	2	81	1.635	30.3005	98.2	184	123	46	76	68	113/80	113	80	2	3	3	2	2	2	2	1	2	1	6	5	4	5	6	1	0	0	0	0	0	0	1	0	0	0	0	0	0	1
33	39	1	2	2	3	1	1	64.4	1.54	27.1547	84	238	176	43	95	95	117/83	117	83	2	3	3	2	2	2	2	1	1	2	5	3	4	5	5	2	0	0	0	0	0	0	1	0	0	0	0	0	0	1
34	42	1	1	2	3	2	1	71	1.55	29.5525	92	179	113	52	70	64	110/70	110	70	4	3	2	1	1	1	2	2	1	2	6	5	2	4	5	1	0	0	0	1	1	1	0	1	0	0	0	1	0	0
35	25	1	2	1	3	2	2	63.6	1.6	24.8437	77.5	100	37.8	44	91	68	99/65	99	65	3	3	3	2	2	2	2	1	2	2	5	5	3	5	5	2	0	0	0	0	0	0	1	0	0	0	0	0	1	0
36	32	1	1	1	2	1	2	56	1.55	23.3091	74	171	120	39	61	68	110/65	110	65	3	3	3	2	2	2	2	1	2	2	4	3	3	5	5	3	0	0	0	0	0	0	1	0	0	0	0	0	1	0
37	30	1	2	2	3	1	2	50.8	1.58	20.3493	67	105	44.2	36	124	64	100/60	100	60	3	3	3	2	2	2	2	2	3	2	5	5	3	4	5	2	0	0	0	0	0	0	0	1	0	0	0	0	1	0
38	52	2	2	2	4	2	2	78.8	1.64	29.298	90	236	178	46	58	70	130/80	130	80	2	3	3	2	2	2	2	2	1	1	5	4	4	4	6	2	0	0	0	0	0	0	0	1	0	0	0	0	0	1
39	51	1	1	1	4	2	1	63.2	1.59	24.999	81	230	180	37	65	81	110/65	110	65	3	3	3	2	2	2	2	1	1	2	5	4	3	5	5	2	0	0	0	0	0	0	1	0	0	0	0	0	1	0
40	20	2	4	1	1	3	1	54	1.68	19.1327	69.2	247	188	44	76	59	120/70	120	70	2	3	3	2	2	2	1	1	4	1	4	5	4	5	6	3	0	0	0	0	0	0	1	0	0	0	0	0	0	1
41	50	1	1	1	3	1	1	65.8	1.54	27.745	82	191	131	35	124	67	119/70	119	70	2	3	3	2	2	2	2	2	2	6	5	5	4	4	1	2	0	0	0	0	0	0	0	1	0	0	0	0	0	1
42	31	1	1	1	3	3	1	50.5	1.61	19.4823	72.5	215	161	30	121	78	120/80	120	80	2	3	3	2	2	2	2	2	2	5	5	5	4	4	2	2	0	0	0	0	0	0	0	1	0	0	0	0	0	1
43	30	2	4	2	4	2	1	68	1.79	21.2228	77	182	126	40	81	55	104/70	104	70	3	3	3	2	2	2	2	1	2	4	5	5	3	5	3	2	0	0	0	0	0	0	1	0	0	0	0	0	1	0
44	50	2	2	2	3	2	1	72.2	1.65	26.5197	91	183	125	32	128	67	100/65	100	65	2	3	3	2	2	2	2	1	2	1	5	5	4	5	6	2	0	0	0	0	0	0	1	0	0	0	0	0	0	1
45	29	1	3	2	3	1	1	57.4	1.63	21.6041	65	199	132	52	76	69	119/68	119	68	3	3	3	2	2	2	2	1	2	2	6	5	3	5	5	1	0	0	0	0	0	0	1	0	0	0	0	0	1	0
46	50	1	2	2	3	1	1	62.9	1.53	26.87	82	185	103	64	90	76	120/70	120	70	2	3	3	2	2	2	2	2	1	5	5	5	4	4	2	2	0	0	0	0	0	0	0	1	0	0	0	0	0	1
47	45	1	2	2	3	1	1	70.9	1.59	28.0448	88	250	164	57	147	100	110/65	110	65	3	3	3	2	2	2	2	1	2	1	5	5	3	5	6	2	0	0	0	0	0	0	1	0	0	0	0	0	1	0
48	17	1	1	1	2	3	1	43.6	1.47	20.1768	66	198	120	51	136	82	100/90	100	90	3	3	3	2	2	2	2	2	3	3	5	5	3	4	4	2	0	0	0	0	0	0	0	1	0	0	0	0	1	0
49	17	1	1	1	3	3	1	54.6	1.53	23.3244	73	240	173	38	143	65	90/65	90	65	3	3	3	2	2	1	1	2	3	3	4	3	3	4	4	3	0	0	0	0	0	0	0	1	0	0	0	0	1	0
50	19	1	1	1	3	3	1	50	1.59	19.7777	68	176	108	56	61	68	1110/65	110	65	2	3	2	1	1	1	1	2	3	4	4	3	4	4	3	3	0	0	0	1	1	1	0	1	0	0	0	0	0	1
51	19	1	2	1	3	3	1	60.8	1.51	26.6655	81	179	111	53	73	65	100/70	100	70	2	1	1	2	2	2	2	2	2	2	5	5	4	4	5	2	1	0	1	0	0	0	0	1	0	0	0	0	0	1
52	48	1	4	1	3	1	1	70.1	1.57	28.4393	92	212	153	43	80	86	110/70	110	70	2	3	3	2	2	2	2	1	3	3	4	5	4	5	4	3	0	0	0	0	0	0	1	0	0	0	0	0	0	1
53	23	1	2	1	3	3	1	45.2	1.46	21.2047	71	136	77.6	46	62	68	110/70	110	70	4	3	3	1	1	2	1	4	4	4	3	4	2	2	3	4	0	0	0	0	1	1	0	0	0	1	0	1	0	0
54	18	2	4	1	3	3	1	69	1.78	21.7776	73.5	171	110	45	79	54	110/70	110	70	3	3	3	1	2	1	2	1	2	3	5	4	3	5	4	2	0	0	0	0	1	0	1	0	0	0	0	0	1	0
55	20	1	3	1	3	3	1	53	1.56	21.7784	69	164	115	36	66	76	110/70	110	70	2	3	3	2	2	2	1	1	2	2	4	4	4	5	5	3	0	0	0	0	0	0	1	0	0	0	0	0	0	1
56	34	2	4	2	2	3	1	69.6	1.7	24.083	89.6	160	102	48	52	110	110/70	110	70	3	3	3	2	2	2	2	1	2	1	6	5	3	5	6	1	0	0	0	0	0	0	1	0	0	0	0	0	1	0
57	49	2	1	2	4	2	1	66	1.7	22.8374	84	146	91.8	32	111	66	90/70	90	70	2	3	3	2	2	2	2	1	1	1	6	5	4	5	6	1	0	0	0	0	0	0	1	0	0	0	0	0	0	1
58	18	1	1	1	3	3	1	41	1.49	18.4676	60	157	95	47	75	70	90/60	90	60	3	3	3	1	2	2	2	1	5	4	5	5	3	5	3	2	0	0	0	0	1	0	1	0	0	0	0	0	1	0
59	18	1	3	1	3	3	1	53	1.45	25.2081	68	117	61.8	43	61	79	118/70	118	70	2	3	3	2	1	2	2	1	2	2	4	4	4	5	5	3	0	0	0	0	0	1	1	0	0	0	0	0	0	1
60	37	2	1	2	3	1	1	57.1	1.74	18.8598	72	191	131	40	101	88	100/65	100	65	2	3	3	2	1	2	2	1	2	3	5	5	4	5	4	2	0	0	0	0	0	1	1	0	0	0	0	0	0	1
61	25	1	3	1	3	3	1	48.3	1.42	23.9536	70	163	109	40	69	67	100/70	100	70	3	3	3	1	2	1	1	2	2	2	5	4	3	4	5	2	0	0	0	0	1	0	0	1	0	0	0	0	1	0
62	38	1	4	2	4	2	1	58.2	1.66	21.1206	71	150	89.8	48	61	74	90/60	90	60	2	3	3	2	2	2	2	1	2	2	6	5	4	5	5	1	0	0	0	0	0	0	1	0	0	0	0	0	0	1
63	45	2	4	2	4	2	1	69.2	1.77	22.0882	85.3	203	158	30	77	88	100/60	100	60	2	3	3	2	2	2	2	1	2	3	5	4	4	5	4	2	0	0	0	0	0	0	1	0	0	0	0	0	0	1
64	27	1	2	1	3	3	1	67.8	1.57	27.5062	85	100	30.2	55	74	67	90/60	90	60	4	3	3	2	2	2	2	2	3	2	5	4	2	4	5	2	0	0	0	0	0	0	0	1	0	0	0	1	0	0
65	29	1	4	2	2	2	1	59	1.55	24.5578	77.2	133	67.4	53	63	95	100/70	100	70	3	3	3	2	2	2	2	2	2	2	6	3	3	4	5	1	0	0	0	0	0	0	0	1	0	0	0	0	1	0
66	20	2	1	1	1	3	1	75.5	1.77	24.0991	77	126	68.4	44	68	78	100/70	100	70	3	3	3	2	2	2	2	1	2	2	5	5	3	5	5	2	0	0	0	0	0	0	1	0	0	0	0	0	1	0
67	37	2	1	2	3	1	1	77	1.75	25.1429	89	174	116	48	51	86	110/80	110	80	2	3	3	2	2	2	2	2	2	2	6	5	4	4	5	1	0	0	0	0	0	0	0	1	0	0	0	0	0	1
68	47	1	1	1	4	2	2	65	1.55	27.0552	81.5	173	125	33	76	78	100/70	100	70	3	3	2	2	2	2	2	2	4	3	5	5	3	4	4	2	0	0	0	1	0	0	0	1	0	0	0	0	1	0
69	30	2	1	2	3	2	2	73	1.7	25.2595	88	161	107	34	102	73	100/80	100	80	2	3	3	2	2	2	2	1	2	2	5	5	4	5	5	2	0	0	0	0	0	0	1	0	0	0	0	0	0	1
70	20	2	2	1	3	3	2	53	1.6	20.7031	69	137	68.8	54	71	81	111/65	111	65	3	3	3	2	1	2	2	1	2	1	5	5	3	5	6	2	0	0	0	0	0	1	1	0	0	0	0	0	1	0
71	23	1	4	1	3	3	1	62	1.72	20.9573	68	188	126	44	90	70	90/60	90	60	2	3	3	2	2	2	2	2	2	2	5	5	4	4	5	2	0	0	0	0	0	0	0	1	0	0	0	0	0	1
72	42	2	1	2	3	1	2	83.6	1.765	26.8359	90.9	182	110	33	197	83	120/70	120	70	3	3	3	2	2	2	2	1	2	3	6	5	3	5	4	1	0	0	0	0	0	0	1	0	0	0	0	0	1	0
73	35	1	1	2	3	1	2	70.5	1.54	29.7268	87	214	149	48	84	76	100/80	100	80	3	3	3	2	2	2	2	2	3	4	5	3	3	4	3	2	0	0	0	0	0	0	0	1	0	0	0	0	1	0
74	32	2	1	1	3	3	2	83	1.69	29.0606	90	179	128	30	103	94	108/66	108	66	3	3	3	2	1	1	1	3	4	3	4	3	3	3	4	3	0	0	0	0	0	1	0	0	1	0	0	0	1	0
75	22	1	1	1	3	3	2	55	1.53	23.4952	72	200	138	51	56	100	90/70	90	70	3	1	1	2	2	1	1	1	2	2	4	5	3	5	5	3	1	0	1	0	0	0	1	0	0	0	0	0	1	0
76	39	1	2	1	3	1	2	46	1.55	19.1467	64	169	105	52	60	66	90/70	90	70	3	3	3	2	2	2	2	2	2	2	5	5	3	4	5	2	0	0	0	0	0	0	0	1	0	0	0	0	1	0
77	22	1	3	1	3	1	2	52	1.65	19.1001	67	107	50.4	45	58	74	90/70	90	70	3	3	2	2	2	2	2	2	2	3	5	5	3	4	4	2	0	0	0	1	0	0	0	1	0	0	0	0	1	0
78	28	2	2	1	3	1	2	59.5	1.64	22.1222	78	106	36	51	95	81	100/80	100	80	2	3	3	2	2	2	2	1	2	3	5	5	4	5	4	2	0	0	0	0	0	0	1	0	0	0	0	0	0	1
79	35	1	1	2	3	1	2	53.5	1.47	24.7582	76	191	132	42	83	78	90/70	90	70	2	3	3	2	2	2	2	2	1	2	5	4	4	4	5	2	0	0	0	0	0	0	0	1	0	0	0	0	0	1
80	41	1	1	2	3	2	1	57.9	1.57	23.4898	77	172	116	38	92	99	110/70	110	70	3	3	3	2	2	2	2	2	3	3	5	4	3	4	4	2	0	0	0	0	0	0	0	1	0	0	0	0	1	0
81	29	1	4	1	3	2	1	53	1.53	22.6409	68.1	129	70.6	43	77	99	100/70	100	70	4	3	3	2	2	2	2	1	2	3	5	4	2	5	4	2	0	0	0	0	0	0	1	0	0	0	0	1	0	0
82	36	1	2	2	3	2	1	60.3	1.51	26.4462	85.7	129	64.4	45	98	84	110/56	110	56	4	3	3	1	1	1	1	3	1	2	5	3	2	3	5	2	0	0	0	0	1	1	0	0	1	0	0	1	0	0
83	46	1	2	2	4	2	1	46	1.5	20.4444	66.7	164	102	47	75	65	125/72	125	72	3	3	3	2	2	2	2	1	1	1	5	5	3	5	6	2	0	0	0	0	0	0	1	0	0	0	0	0	1	0
84	32	1	2	2	3	2	2	46.4	1.48	21.1833	70	138	83.2	38	84	71	85/65	85	65	3	2	2	1	2	2	1	2	4	3	5	3	3	4	4	2	0	1	0	1	1	0	0	1	0	0	0	0	1	0
85	42	1	4	2	4	2	1	61	1.6	23.8281	80.4	110	57.6	37	77	88	100/70	100	70	2	3	3	2	2	2	2	2	2	2	5	5	4	4	5	2	0	0	0	0	0	0	0	1	0	0	0	0	0	1
86	54	1	1	2	4	2	1	60.5	1.43	29.5858	98	180	112	43	123	105	100/70	100	70	3	3	2	1	1	2	2	1	2	4	4	3	3	5	3	3	0	0	0	1	1	1	1	0	0	0	0	0	1	0
87	43	1	1	2	4	2	2	65.3	1.63	24.5775	81	129	58.2	48	114	74	85/65	85	65	3	3	3	2	2	1	1	1	1	1	6	5	3	5	6	1	0	0	0	0	0	0	1	0	0	0	0	0	1	0
88	59	1	1	2	3	2	2	62	1.56	25.4767	86.7	166	74	63	145	88	120/70	120	70	4	3	3	2	2	2	2	2	1	1	5	5	2	4	6	2	0	0	0	0	0	0	0	1	0	0	0	1	0	0
89	26	1	2	1	2	1	2	56.5	1.56	23.2166	70	172	104	43	126	73	100/65	100	65	3	2	2	2	2	1	1	2	4	4	3	3	3	4	3	4	0	1	0	1	0	0	0	1	0	0	0	0	1	0
90	28	1	1	1	3	2	2	67.6	1.65	24.8301	81	123	60	53	50	91	100/65	100	65	2	3	3	2	2	2	2	1	1	2	4	4	4	5	5	3	0	0	0	0	0	0	1	0	0	0	0	0	0	1
91	46	1	1	2	2	1	2	60	1.59	23.7332	80.1	206	138	47	105	96	85/65	85	65	3	3	2	2	2	2	2	3	1	3	4	3	3	3	4	3	0	0	0	1	0	0	0	0	1	0	0	0	1	0
92	31	1	1	1	4	2	2	55	1.53	23.4952	79.1	172	114	48	52	80	89/60	89	60	3	3	3	2	2	2	2	1	4	4	4	4	3	5	3	3	0	0	0	0	0	0	1	0	0	0	0	0	1	0
93	51	1	2	2	3	2	2	67.4	1.51	29.5601	97.6	206	94.4	76	178	74	100/70	100	70	3	1	1	2	2	2	2	2	3	3	4	3	3	4	4	3	1	0	1	0	0	0	0	1	0	0	0	0	1	0
94	23	1	1	1	3	3	2	51.1	1.53	21.8292	73	120	70.6	37	62	75	100/70	100	70	3	3	2	2	2	1	1	2	3	3	4	2	3	4	4	3	0	0	0	1	0	0	0	1	0	0	0	0	1	0
95	37	1	1	1	4	2	2	66.9	1.67	23.988	72.5	143	88.8	45	46	79	100/65	100	65	2	3	3	2	2	2	2	1	2	2	6	5	4	5	5	1	0	0	0	0	0	0	1	0	0	0	0	0	0	1
96	35	1	1	1	3	2	2	84	1.79	26.2164	88.1	137	86.2	40	54	64	95/65	95	65	3	3	3	2	2	2	2	1	3	4	4	4	3	5	3	3	0	0	0	0	0	0	1	0	0	0	0	0	1	0
97	30	2	4	2	2	2	2	82	1.75	26.7755	99.7	147	62.6	48	182	76	120/90	120	90	3	3	3	1	1	2	2	3	2	2	6	4	3	3	5	1	0	0	0	0	1	1	0	0	1	0	0	0	1	0
98	40	1	2	2	4	2	2	64.8	1.58	25.9574	86.4	157	80	58	95	84	95/65	95	65	1	3	3	2	2	2	2	1	1	1	6	5	5	5	6	1	0	0	0	0	0	0	1	0	0	0	0	0	0	0
99	25	1	3	2	3	2	2	46	1.53	19.6506	66.6	129	56.8	66	31	76	100/65	100	65	2	3	3	2	2	2	2	2	3	4	4	4	4	4	3	3	0	0	0	0	0	0	0	1	0	0	0	0	0	1
100	34	1	4	2	3	2	2	59	1.66	21.4109	69.8	115	57	49	45	54	65/90	65	90	2	3	2	2	2	2	2	1	3	3	4	3	4	5	4	3	0	0	0	1	0	0	1	0	0	0	0	0	0	1
101	39	1	4	2	3	2	2	46.8	1.54	19.7335	63.2	166	93	54	95	73	110/80	110	80	3	3	3	2	2	2	2	2	2	2	5	4	3	4	5	2	0	0	0	0	0	0	0	1	0	0	0	0	1	0
102	32	1	1	1	2	1	2	53.2	1.49	23.9629	75.3	138	67.8	52	91	74	125/65	125	65	3	3	2	2	2	2	2	1	1	3	6	5	3	5	4	1	0	0	0	1	0	0	1	0	0	0	0	0	1	0
103	42	1	1	1	3	2	2	50.3	1.52	21.7711	74.3	184	130	38	82	77	100/65	100	65	3	2	2	1	2	2	2	2	4	4	4	3	3	4	3	3	0	1	0	1	1	0	0	1	0	0	0	0	1	0
104	46	1	1	2	4	2	2	54.3	1.48	24.79	85.2	145	77.8	38	146	73	100/80	100	80	4	2	3	2	2	2	2	1	3	3	5	5	2	5	4	2	0	1	0	0	0	0	1	0	0	0	0	1	0	0
105	30	1	1	1	4	1	2	54	1.48	24.653	75	168	116	32	101	93	99/69	99	69	3	3	3	2	2	2	2	1	2	1	6	3	3	5	6	1	0	0	0	0	0	0	1	0	0	0	0	0	1	0
106	29	1	2	2	3	2	2	60	1.65	22.0386	71.5	170	56.4	75	193	71	110/76	110	76	3	2	3	1	1	1	2	4	1	3	4	2	3	2	4	3	0	1	0	0	1	1	0	0	0	1	0	0	1	0
107	50	2	2	1	4	2	2	84	1.78	26.5118	90.2	146	88.8	43	71	84	110/70	110	70	1	3	3	2	2	2	2	1	1	1	5	5	5	5	6	2	0	0	0	0	0	0	1	0	0	0	0	0	0	0
108	52	1	2	2	3	2	1	58	1.46	27.2096	89.2	169	100	46	115	100	120/90	120	90	3	3	3	2	2	2	2	1	2	2	5	3	3	5	5	2	0	0	0	0	0	0	1	0	0	0	0	0	1	0
109	60	1	2	2	4	2	2	65.8	1.47	30.4503	91.5	178	124	39	75	71	120/70	120	70	3	3	3	2	2	2	2	2	2	2	5	3	3	4	5	2	0	0	0	0	0	0	0	1	0	0	0	0	1	0
110	27	1	1	1	3	2	1	51	1.51	22.3674	68	123	50.8	54	91	92	90/65	90	65	3	3	3	2	2	1	1	2	2	2	4	3	3	4	5	3	0	0	0	0	0	0	0	1	0	0	0	0	1	0
111	28	2	1	2	3	2	2	72	1.72	24.3375	89.9	123	65.8	35	111	81	100/70	100	70	4	3	2	2	2	1	1	1	3	3	4	3	2	5	4	3	0	0	0	1	0	0	1	0	0	0	0	1	0	0
112	55	2	1	2	2	1	2	69	1.6	26.9531	91	107	49.2	33	124	87	110/70	110	70	3	3	3	2	2	2	2	1	2	3	5	5	3	5	4	2	0	0	0	0	0	0	1	0	0	0	0	0	1	0
113	49	2	1	2	4	2	1	58	1.6	22.6562	80.5	130	67.6	39	117	76	120/83	120	83	2	3	3	2	2	2	2	2	2	2	5	4	4	4	5	2	0	0	0	0	0	0	0	1	0	0	0	0	0	1
114	31	2	1	2	4	2	2	62.5	1.57	25.356	82.3	143	92.8	34	81	73	100/65	100	65	1	3	3	2	2	1	2	1	2	2	5	3	5	5	5	2	0	0	0	0	0	0	1	0	0	0	0	0	0	0
115	40	1	1	2	3	2	2	53.2	1.59	21.0435	71.4	138	83.2	38	84	71	80/68	80	68	2	3	3	1	2	2	2	2	2	2	5	4	4	4	5	2	0	0	0	0	1	0	0	1	0	0	0	0	0	1
116	39	1	1	1	2	2	2	54.5	1.57	22.1104	74	180	105	53	111	75	90/70	90	70	2	2	2	2	2	2	1	2	3	3	3	4	4	4	4	4	0	1	0	1	0	0	0	1	0	0	0	0	0	1
117	54	1	2	1	3	2	2	56	1.5	24.8889	76	221	133	60	141	101	110/65	110	65	2	3	3	1	2	2	2	2	2	1	5	5	4	4	6	2	0	0	0	0	1	0	0	1	0	0	0	0	0	1
118	54	1	2	2	3	2	2	60.5	1.53	25.8448	89.2	123	66	45	60	83	90/60	90	60	3	2	3	2	2	2	2	2	3	2	4	3	3	4	5	3	0	1	0	0	0	0	0	1	0	0	0	0	1	0
119	24	1	2	1	3	3	1	55	1.6	21.4844	71	160	88.6	51	102	77	80/58	80	58	2	3	3	1	2	1	1	2	2	3	5	4	4	4	4	2	0	0	0	0	1	0	0	1	0	0	0	0	0	1
120	34	1	4	2	3	2	1	63.4	1.59	25.0781	80.9	195	105	55	173	80	100/70	100	70	3	3	2	2	2	2	2	1	2	4	5	5	3	5	3	2	0	0	0	1	0	0	1	0	0	0	0	0	1	0
121	23	1	4	2	3	2	1	68	1.78	21.4619	73	212	147	42	117	67	103/65	103	65	2	3	3	2	2	2	2	2	2	2	5	5	4	4	5	2	0	0	0	0	0	0	0	1	0	0	0	0	0	1
122	28	1	4	2	3	2	1	52	1.61	20.061	62	210	146	42	112	63	97/60	97	60	2	3	3	2	2	2	2	2	2	5	5	5	4	4	2	2	0	0	0	0	0	0	0	1	0	0	0	0	0	1
123	43	1	1	1	3	2	1	49.4	1.6	19.2969	66	157	64.2	66	134	72	103/65	103	65	4	3	3	2	2	2	2	1	3	4	6	5	2	5	3	1	0	0	0	0	0	0	1	0	0	0	0	1	0	0
124	44	1	2	2	4	2	2	80.4	1.52	34.7992	105.1	176	111	42	116	80	112/80	112	80	3	3	3	2	2	2	2	1	2	2	4	5	3	5	5	3	0	0	0	0	0	0	1	0	0	0	0	0	1	0
125	43	1	2	1	4	2	1	45	1.49	20.2694	69.5	225	138	66	106	76	89/63	89	63	2	3	3	2	2	2	2	1	1	6	1	5	4	5	1	6	0	0	0	0	0	0	1	0	0	0	0	0	0	1
126	25	1	3	1	3	1	2	73	1.54	30.7809	80	249	175	37	184	65	90/70	90	70	3	3	2	1	2	2	1	3	2	2	4	4	3	3	5	3	0	0	0	1	1	0	0	0	1	0	0	0	1	0
127	26	2	1	1	3	2	1	62	1.765	19.9023	74	143	63.6	52	137	81	100/70	100	70	3	3	3	2	2	2	2	1	1	1	5	4	3	5	6	2	0	0	0	0	0	0	1	0	0	0	0	0	1	0
128	21	2	2	1	3	3	2	64	1.63	24.0882	84	149	81	57	55	90	118/79	118	79	3	3	3	2	2	2	2	1	3	2	5	5	3	5	5	2	0	0	0	0	0	0	1	0	0	0	0	0	1	0
129	20	2	2	1	3	3	2	69.4	1.65	25.4913	85	150	81	57	74	93	120/70	120	70	4	3	3	2	2	2	2	1	2	1	1	1	2	5	6	6	0	0	0	0	0	0	1	0	0	0	0	1	0	0
130	18	1	3	1	3	3	2	49.5	1.5	22	70	160	87	54	95	85	99/70	99	70	4	3	3	1	1	1	1	1	4	3	4	5	2	5	4	3	0	0	0	0	1	1	1	0	0	0	0	1	0	0
131	26	1	1	1	3	2	2	57	1.58	22.8329	76	164	94.6	44	127	92	115/78	115	78	3	3	2	2	2	2	2	1	2	2	4	5	3	5	5	3	0	0	0	1	0	0	1	0	0	0	0	0	1	0
132	55	1	1	1	4	2	2	60	1.55	24.974	78	173	96.6	56	102	97	110/70	110	70	3	3	3	1	2	2	2	1	3	3	4	2	3	5	4	3	0	0	0	0	1	0	1	0	0	0	0	0	1	0
133	22	1	3	1	2	1	2	53.2	1.56	21.8606	71	121	73.6	34	67	85	80/60	80	60	3	3	3	1	1	2	2	2	1	1	6	5	3	4	6	1	0	0	0	0	1	1	0	1	0	0	0	0	1	0
134	19	1	1	1	3	3	2	48.5	1.5	21.5556	68	152	99	44	45	94	83/63	83	63	2	3	3	2	2	1	1	1	2	2	5	4	4	5	5	2	0	0	0	0	0	0	1	0	0	0	0	0	0	1
135	39	1	1	1	4	1	2	62	1.57	25.1532	85.3	153	67.2	60	129	74	99/65	99	65	3	2	2	1	1	1	2	2	3	4	4	3	3	4	3	3	0	1	0	1	1	1	0	1	0	0	0	0	1	0
136	49	1	3	2	2	1	2	57.2	1.5	25.4222	81.1	149	65	41	215	90	110/70	110	70	3	2	2	2	2	2	2	2	2	1	5	4	3	4	6	2	0	1	0	1	0	0	0	1	0	0	0	0	1	0
137	51	2	1	2	2	1	2	85.6	1.65	31.4417	98	253	152	64	186	107	110/80	110	80	3	3	3	2	2	2	2	1	2	2	5	3	3	5	5	2	0	0	0	0	0	0	1	0	0	0	0	0	1	0
138	19	2	3	1	1	1	2	60.9	1.65	22.3691	74	126	48.2	49	144	78	100/70	100	70	3	3	3	1	2	2	2	2	2	3	5	5	3	4	4	2	0	0	0	0	1	0	0	1	0	0	0	0	1	0
139	48	2	1	2	2	1	2	84.2	1.709	28.8289	94.5	176	119	43	70	109	110/80	110	80	3	3	3	2	2	2	2	1	1	1	6	5	3	5	6	1	0	0	0	0	0	0	1	0	0	0	0	0	1	0
140	31	2	1	1	2	1	2	63.8	1.729	21.3418	79	210	95.8	70	221	80	90/78	90	78	3	3	3	1	1	1	1	1	3	3	4	2	3	5	4	3	0	0	0	0	1	1	1	0	0	0	0	0	1	0
141	53	2	2	2	2	1	2	96.1	1.7	33.2526	110.3	170	121	32	85	77	127/83	127	83	3	3	3	2	2	1	2	1	1	1	6	5	3	5	6	1	0	0	0	0	0	0	1	0	0	0	0	0	1	0
142	48	2	1	2	2	1	2	81.5	1.709	27.9045	95.3	250	153	64	163	85	120/80	120	80	3	3	3	2	2	2	2	1	1	1	6	4	3	5	6	1	0	0	0	0	0	0	1	0	0	0	0	0	1	0
143	45	2	1	2	2	1	2	71.8	1.678	25.5	81.5	174	108	42	118	78	123/90	123	90	3	3	3	2	2	2	2	1	2	2	6	5	3	5	5	1	0	0	0	0	0	0	1	0	0	0	0	0	1	0
144	32	2	1	2	2	1	2	87.1	1.7	30.1384	98.8	206	124	60	110	74	110/80	110	80	3	3	2	2	2	2	2	2	2	2	6	4	3	4	5	1	0	0	0	1	0	0	0	1	0	0	0	0	1	0
145	37	2	1	2	2	1	2	71.4	1.711	24.3892	86	118	63.8	40	71	94	125/98	125	98	4	3	3	2	2	2	2	2	2	4	3	3	2	4	3	4	0	0	0	0	0	0	0	1	0	0	0	1	0	0
146	45	2	3	2	2	1	2	81.2	1.727	27.2252	91.2	155	108	34	66	71	120/90	120	90	2	3	3	2	2	2	2	1	2	2	4	5	4	5	5	3	0	0	0	0	0	0	1	0	0	0	0	0	0	1
147	33	2	2	2	2	1	2	65.7	1.62	25.0343	90	174	97	45	160	85	113/88	113	88	3	3	3	1	2	1	2	1	3	2	5	3	3	5	5	2	0	0	0	0	1	0	1	0	0	0	0	0	1	0
148	29	2	3	2	2	1	2	67.1	1.59	26.5417	88	197	126	31	200	98	120/87	120	87	2	3	3	2	2	2	2	1	1	1	6	5	4	5	6	1	0	0	0	0	0	0	1	0	0	0	0	0	0	1
149	52	2	1	2	2	1	2	82.1	1.74	27.1172	95	189	119	55	77	84	103/78	103	78	1	3	3	2	2	2	2	1	1	1	6	5	5	5	6	1	0	0	0	0	0	0	1	0	0	0	0	0	0	0
[truncated: 25 more columns]
